# Supplementary material
Source: PubMed Central journal article supplement (PMC4291484)

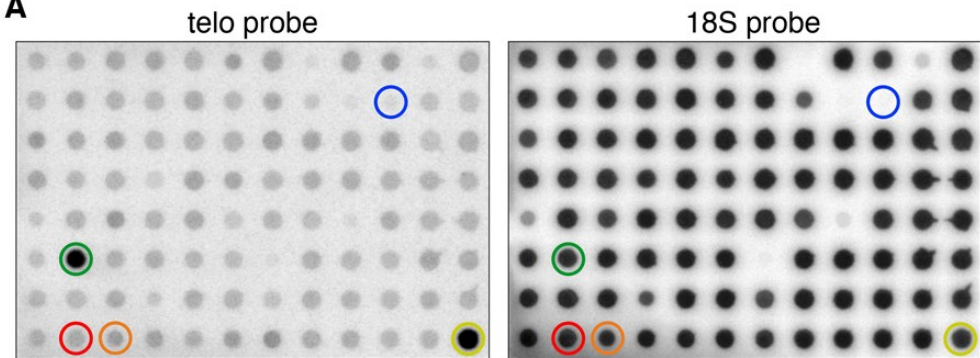

telo signal/18S signal (fold increase vs wt<sup>A</sup>)

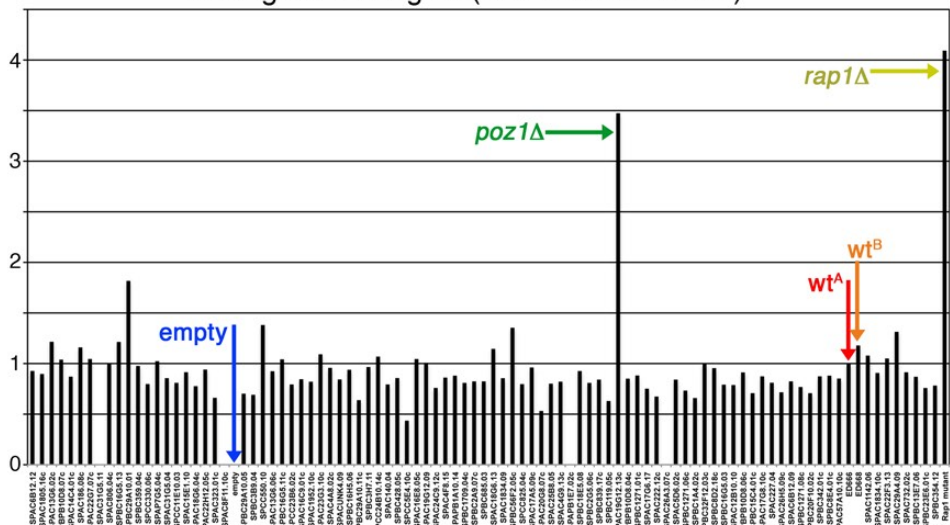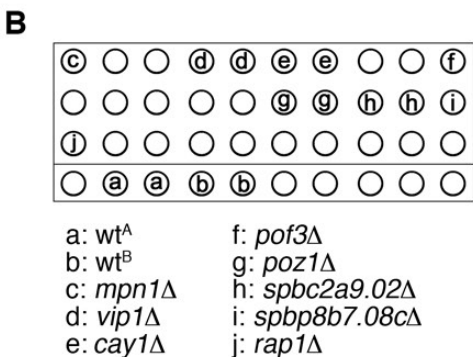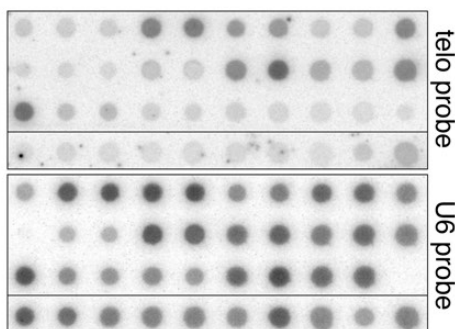

Supplement: embj0034-0115-sd1.pdf [file embj0034-0115-sd1.pdf]

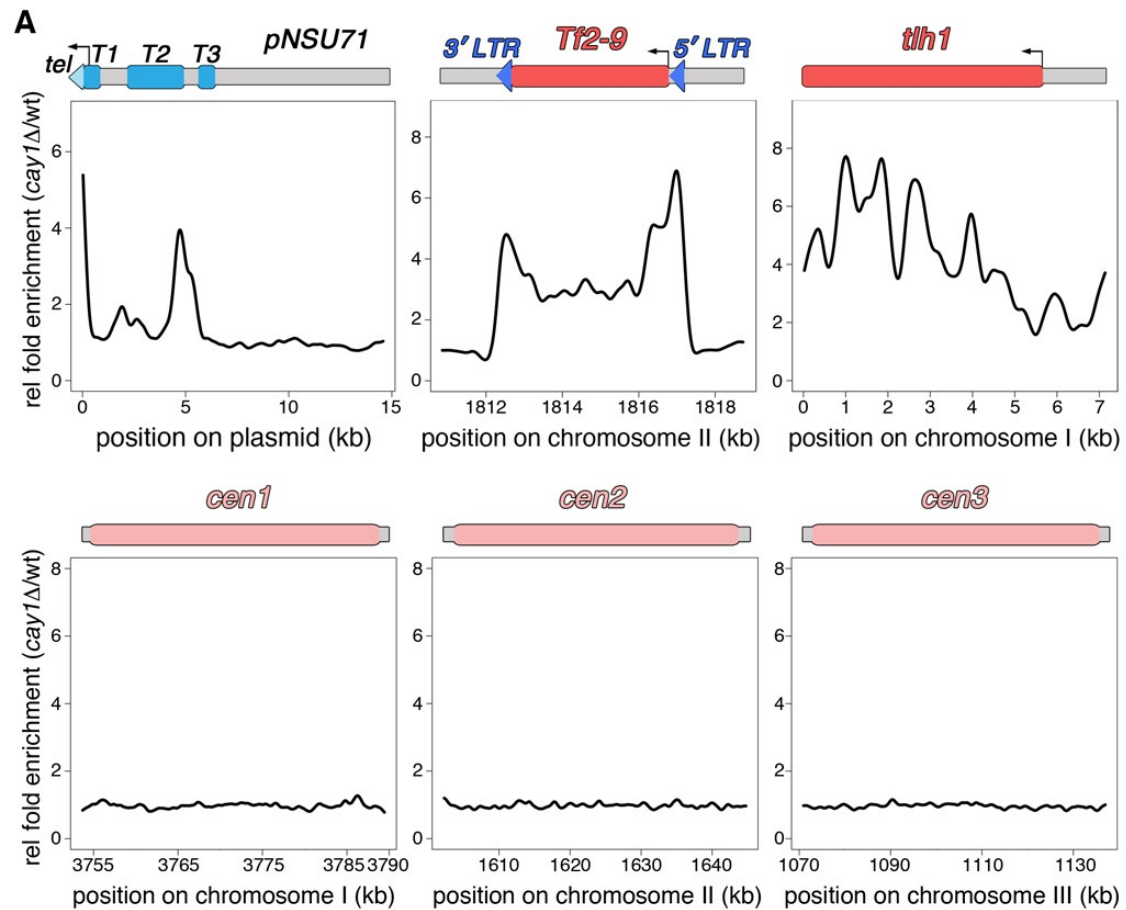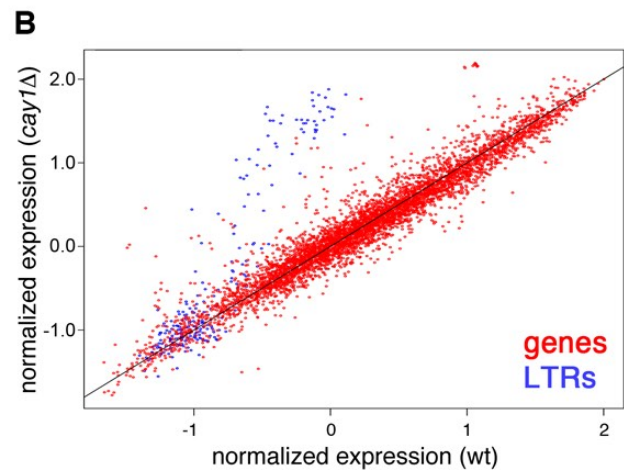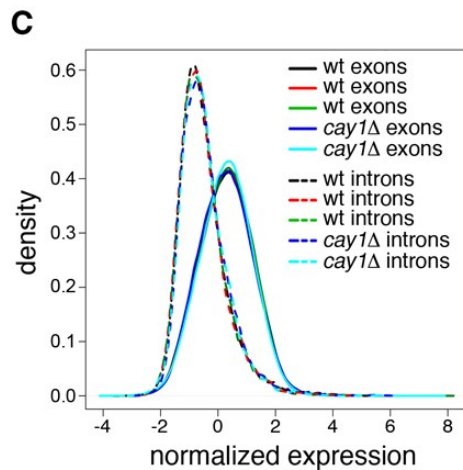

Supplement: embj0034-0115-sd2.pdf [file embj0034-0115-sd2.pdf]

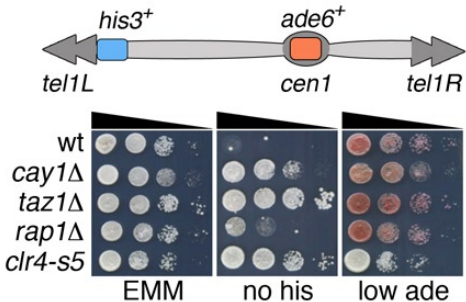

**Lorenzi et al. Supplementary Figure S3**

Supplement: embj0034-0115-sd3.pdf [file embj0034-0115-sd3.pdf]

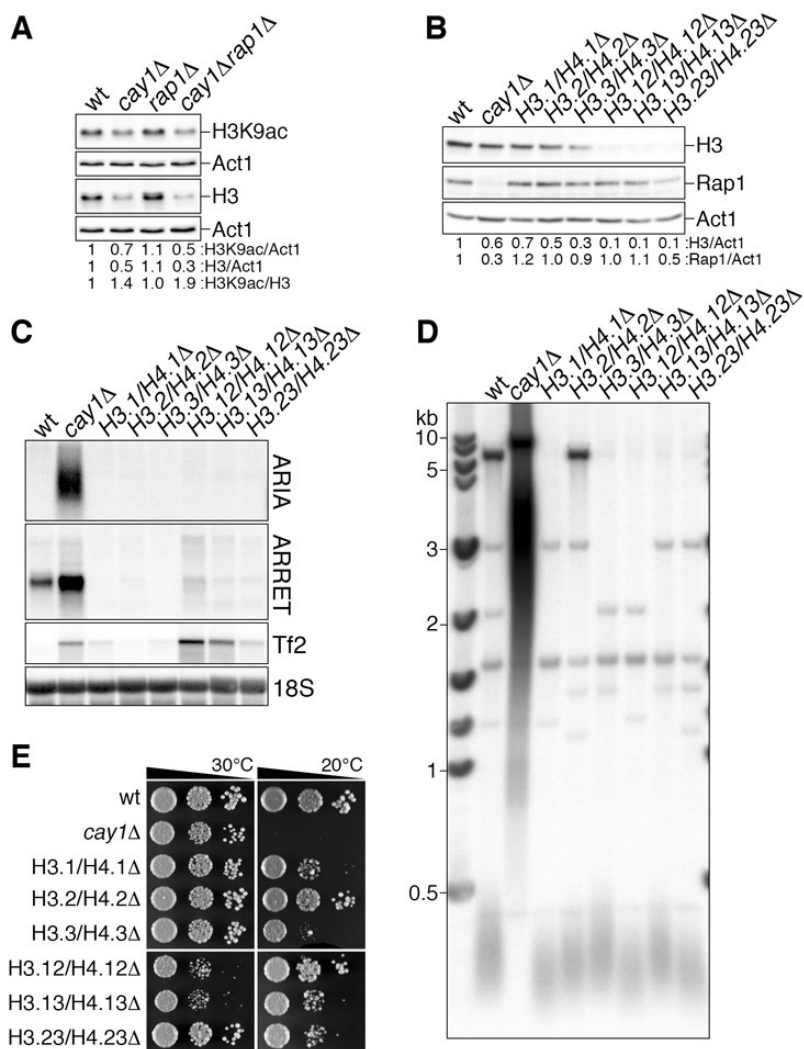

Supplement: embj0034-0115-sd4.pdf [file embj0034-0115-sd4.pdf]

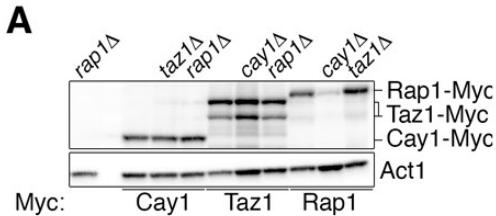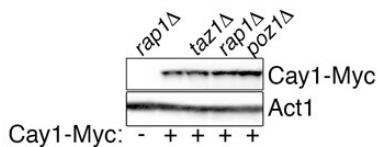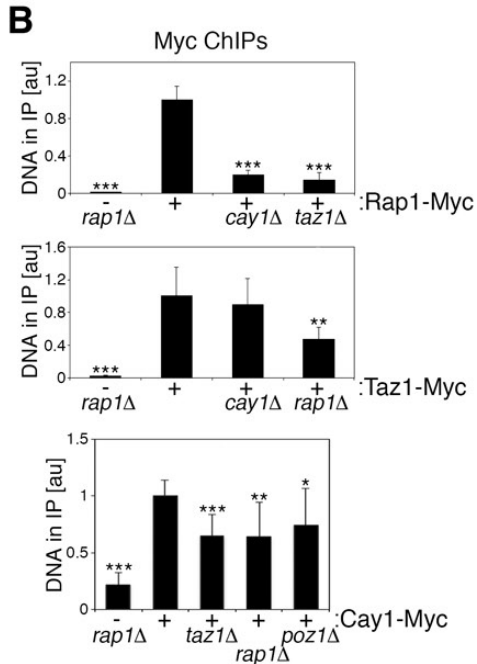

Lorenzi et al. Supplementary Figure S5

Supplement: embj0034-0115-sd5.pdf [file embj0034-0115-sd5.pdf]

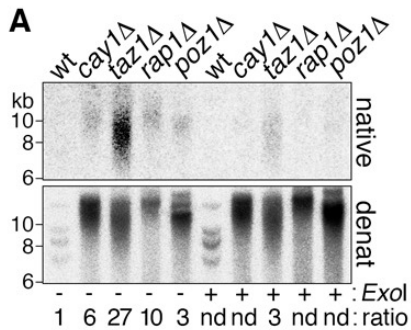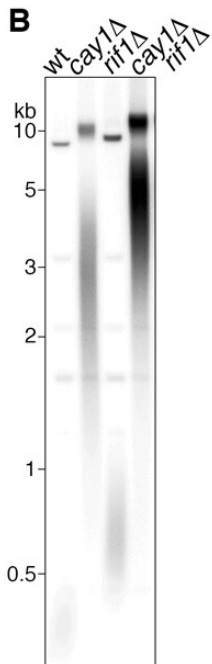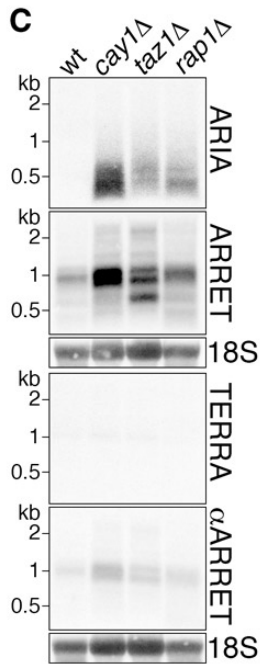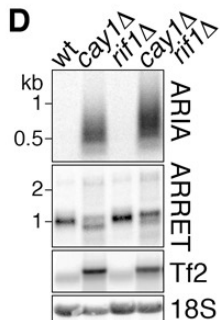

**Lorenzi et al. Supplementary Figure S6**

Supplement: embj0034-0115-sd6.pdf [file embj0034-0115-sd6.pdf]

**A***trt1<sup>+</sup>*: linear chromosomes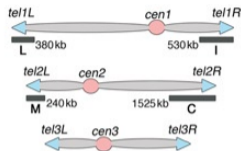*trt1Δ*: circular chromosomes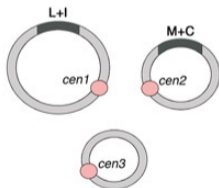**B**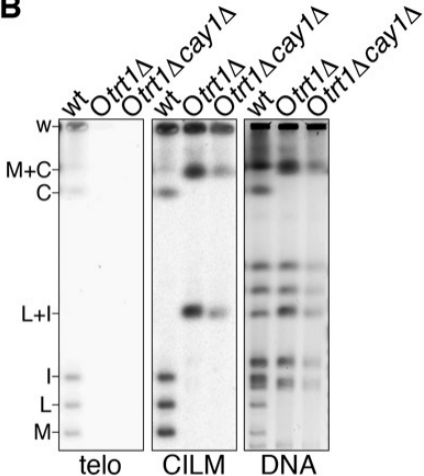

Supplement: embj0034-0115-sd7.pdf [file embj0034-0115-sd7.pdf]
